# Supplementary material for: COPII machinery cooperates with ER-localized Hsp40 to sequester misfolded membrane proteins into ER-associated compartments
Source: PubMed Central journal article supplement — Mol Biol Cell. 2013 Mar 1;24(5):633–42. doi: 10.1091/mbc.E12-08-0639 (PMC3583666; doi:10.1091/mbc.e12-08-0639), 2013-03-01
Supplement: supp_E12-08-0639v1_CombinedSupMats.pdf [file supp_E12-08-0639v1_CombinedSupMats.pdf]

## Supplement Figure S1

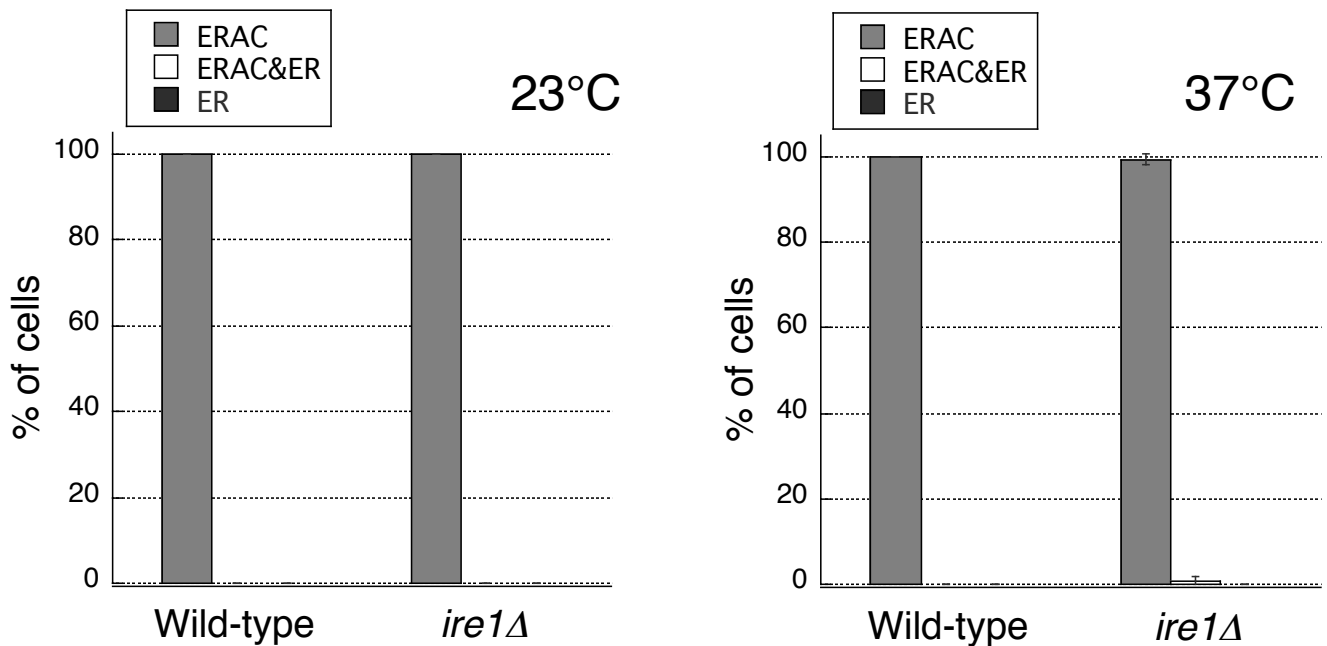

Figure S1. EGFP-CFTR is normally sequestered into ERACs in cells lacking *IRE1*. Wild-type (BY4741) and isogenic *ire1Δ* cells containing the EGFP-CFTR plasmid were grown to mid-log phase and incubated with copper at 23°C (left panel) or 37°C (right panel) for 2h to induce EGFP-CFTR expression. ERAC formation was quantified as described in Figure 1B.

Supplemental Table S1. Yeast strains used in this study

| Strain                                  | Genotype                                                                                                       | Reference              |
|-----------------------------------------|----------------------------------------------------------------------------------------------------------------|------------------------|
| ANY21                                   | <i>MATa ura3-52 leu2-3,112 trp1-289 his3 his4 suc gal2</i>                                                     | Nakano et al., 1988    |
| MBY10-7A                                | <i>MATa sec12-4 ura3-52 leu2-3,112 trp1-289 his3 his4 suc gal2</i>                                             | Bernstein and Schekman |
| MBY3-15A                                | <i>MATa sec13-1 ura3-52 leu2-3,112 trp1-289 his3 his4</i>                                                      | Bernstein and Schekman |
| MBY8-20C                                | <i>MATa sec23-1 ura3-52 leu2-3,112 trp1-289 his3 his4</i>                                                      | Bernstein and Schekman |
| MBY4-1A                                 | <i>MATa sec16-2 ura3-52 trp1-289 his3 his4</i>                                                                 | Bernstein and Schekman |
| MBY11-1D                                | <i>MATa sec17-1 ura3-52 leu2-3,112 trp1-289 his3 his4 suc</i>                                                  | Bernstein and Schekman |
| MBY12-6D                                | <i>MATa sec18-1 ura3-52 leu2-3,112 trp1-289 his3 his4</i>                                                      | Bernstein and Schekman |
| TOY223                                  | <i>MAT<math>\alpha</math> sar1::HIS3 pep4::ADE2 ura3 leu2 trp1 his3 ade2 lys2 /pMYY3-7(YCp[sar1D32G TRP1])</i> | Saito et al., 1999     |
| BY4741                                  | <i>MATa his3<math>\Delta</math> leu2<math>\Delta</math> met15<math>\Delta</math> ura3<math>\Delta</math></i>   | Rearch Genetics        |
| BY4741, <i>erv29<math>\Delta</math></i> | BY4741 <i>erv29::KanMX6</i>                                                                                    | Rearch Genetics        |
| BY4741, <i>ydj1<math>\Delta</math></i>  | BY4741 <i>ydj1::KanMX6</i>                                                                                     | Rearch Genetics        |
| BY4741, <i>hlj1<math>\Delta</math></i>  | BY4741 <i>hlj1::KanMX6</i>                                                                                     | Rearch Genetics        |
| BY4741, <i>apj1<math>\Delta</math></i>  | BY4741 <i>apj1::KanMX6</i>                                                                                     | Rearch Genetics        |
| BY4741, <i>ire1<math>\Delta</math></i>  | BY4741 <i>ire1::KanMX6</i>                                                                                     | Rearch Genetics        |
